# Supplementary material for: Complementary hydrogen-bonding between thymidine-based low molecular-weight gelator and polynucleotide in organic mediaElectronic supplementary information (ESI) available: IR spectral changes in 1 gel induced by poly(A)/lipid addition; TEM images of 1 gel and 1 with poly(A)/lipid (1.0 eq.) gel, and SEM image of 1 with poly(A)/lipid gel (0.5 eq.). See http://www.rsc.org/suppdata/cc/b4/b407756n/
Source: Royal Society of Chemistry journal article supplement (doi:10.1039/b407756n), 2004-01-01
Supplement: b407756n.pdf [file b407756n.pdf]

## Supplementary Information

### Complementary hydrogen-bonding between thymidine-based low molecular-weight gelator and polynucleotide in organic media

Kazunori Sugiyasu<sup>a</sup>, Munenori Numata<sup>a</sup>, Norifumi Fujita<sup>a</sup>, Sun Min Park<sup>b</sup>, Young Ji Yun<sup>b</sup>, Byeang Hyeon Kim<sup>b</sup> and Seiji Shinkai<sup>\*a</sup>

<sup>a</sup> Department of Chemistry and Biochemistry, Graduate School of Engineering, Kyushu University, 6-10-1 Hakozaki, Higashi-ku Fukuoka, Japan. E-mail: seijitcm@mbox.nc.kyushu-u.ac.jp

<sup>b</sup> National Research Laboratory, Department of Chemistry, Division of Molecular and Life Science, Pohang University of Science and Technology, Pohang 790-784, Korea. E-mail: bhkim@postech.ac.kr

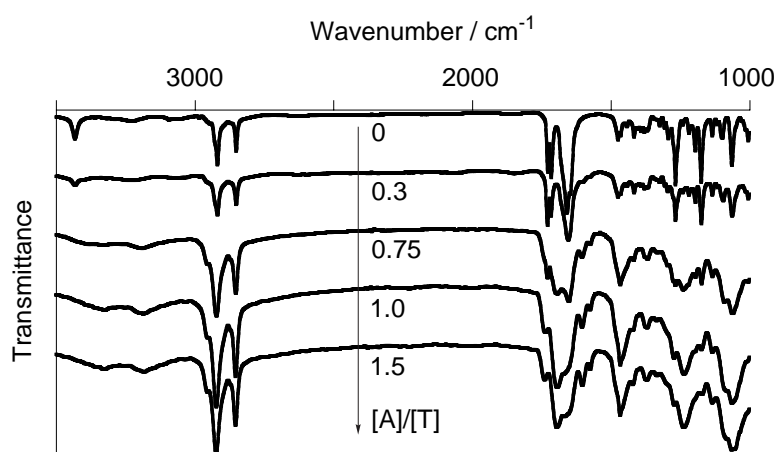

Fig. S1 IR spectral changes in 1 gel induced by poly(A)/lipid addition.

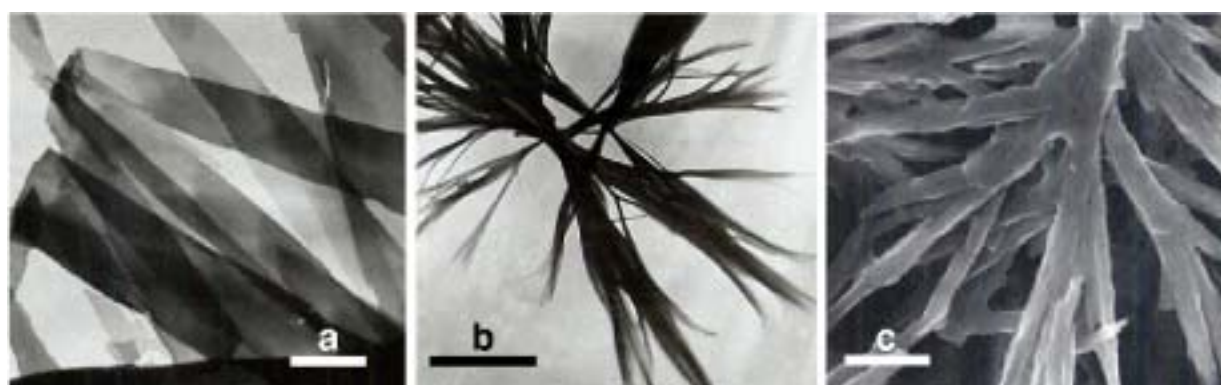

Fig. S2 TEM images of (a) 1 gel and (b) 1 with poly(A)/lipid (1.0 eq.) gel, and (c) SEM image of 1 with poly(A)/lipid gel (0.5 eq.), bar length = 5 μm.
